# Supplementary material for: Generation Times of E. coli Prolong with Increasing Tannin Concentration while the Lag Phase Extends Exponentially
Source: PubMed Central journal article supplement (PMC7760653; doi:10.3390/plants9121680), 2020-12-01
Supplement: plants-09-01680-s001.pdf [file plants-09-01680-s001.pdf]

# Plants

## Supplementary Material

### **Generation times of *E. coli* prolong with increasing tannin concentration while the lag phase extends exponentially**

*Sara Štumpf*<sup>1</sup>, *Gregor Hostnik*<sup>1</sup>, *Mateja Primožič*<sup>1</sup>, *Maja Leitgeb*<sup>1,2</sup>, *Urban Bren*<sup>1,3,\*</sup>

<sup>1</sup> Faculty of Chemistry and Chemical Engineering, University of Maribor, 2000 Maribor, Slovenia, <sup>2</sup> Faculty of Medicine, University of Maribor, 2000 Maribor, Slovenia, <sup>3</sup> Faculty of Mathematics, Natural Sciences and Information Technologies, University of Primorska, 6000 Koper, Slovenia

\*Corresponding Author

E-mail address: [urban.bren@um.si](mailto:urban.bren@um.si) (U. Bren)

Tel.: +386-2-2294-421

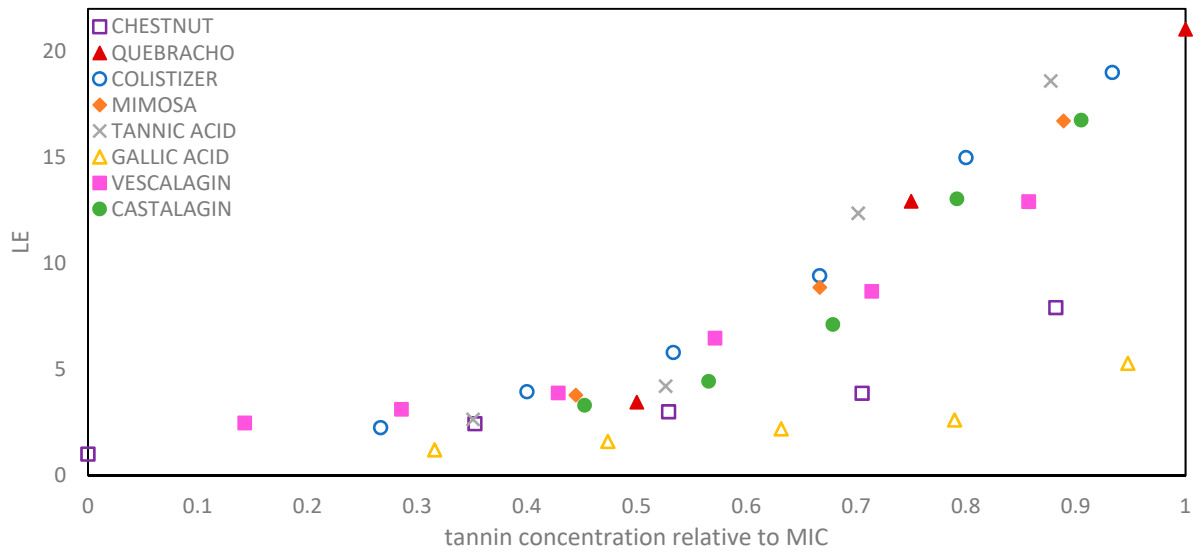

Figure S1. Dependence of lag time extension (LE) on the normalized concentration of investigated agents ( $c_M$ ).

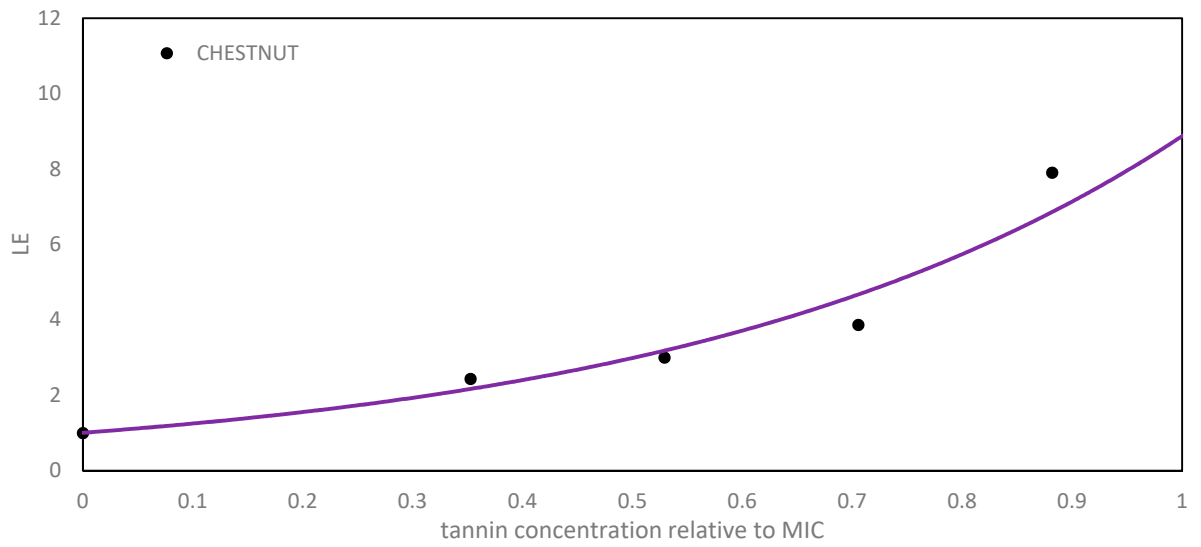

Figure S2. Dependence of lag time extension (LE) on the normalized concentration of the chestnut extract ( $c_M$ ).

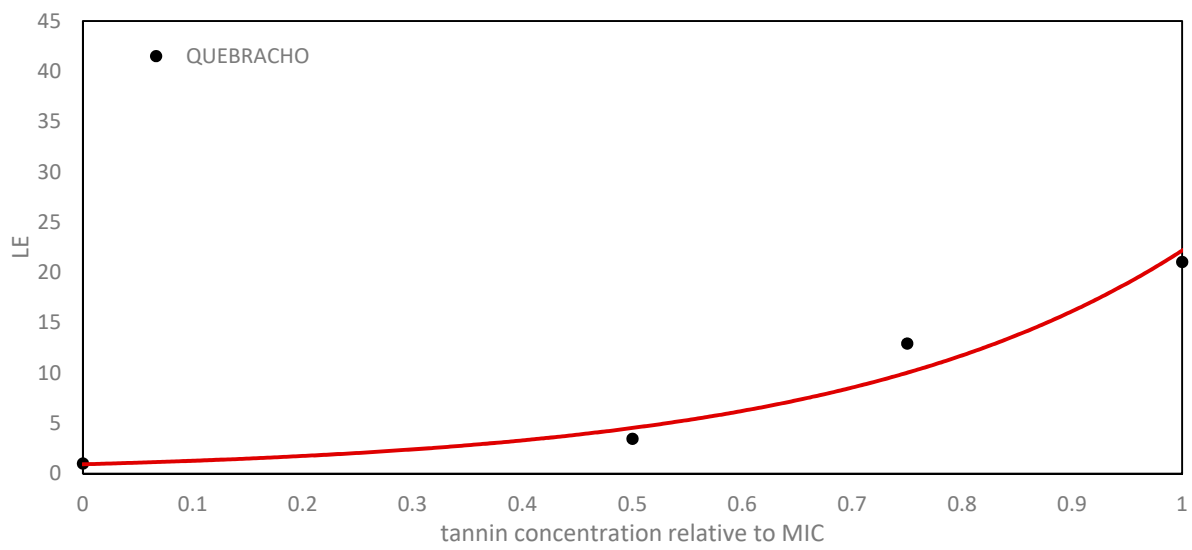

**Figure S3.** Dependence of lag time extension (LE) on the normalized concentration of the quebracho extract ( $c_M$ ).

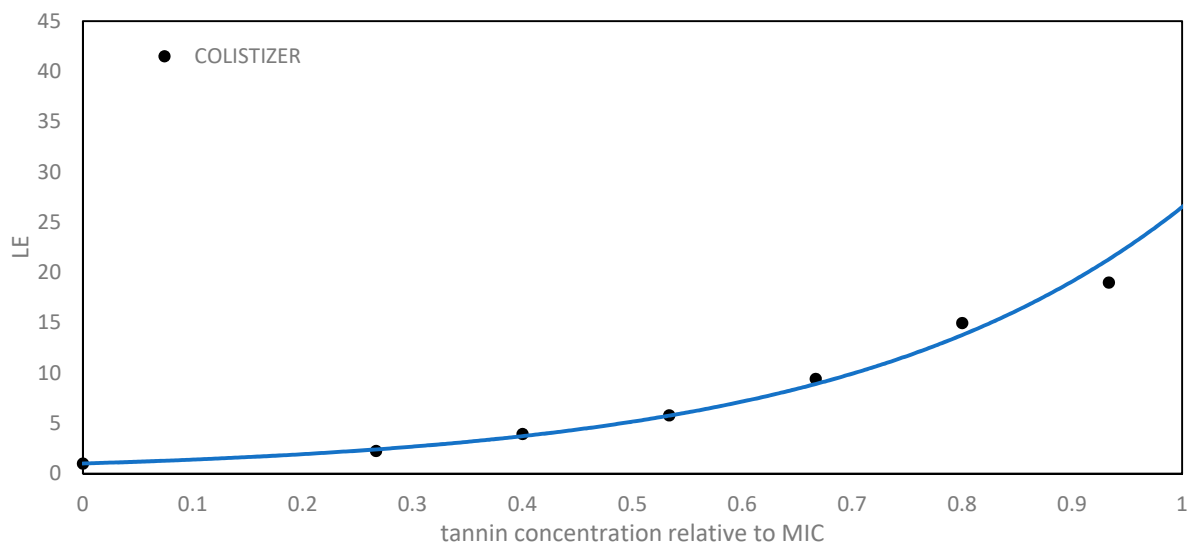

**Figure S4.** Dependence of lag time extension (LE) on the normalized concentration of Colistizer ( $c_M$ ).

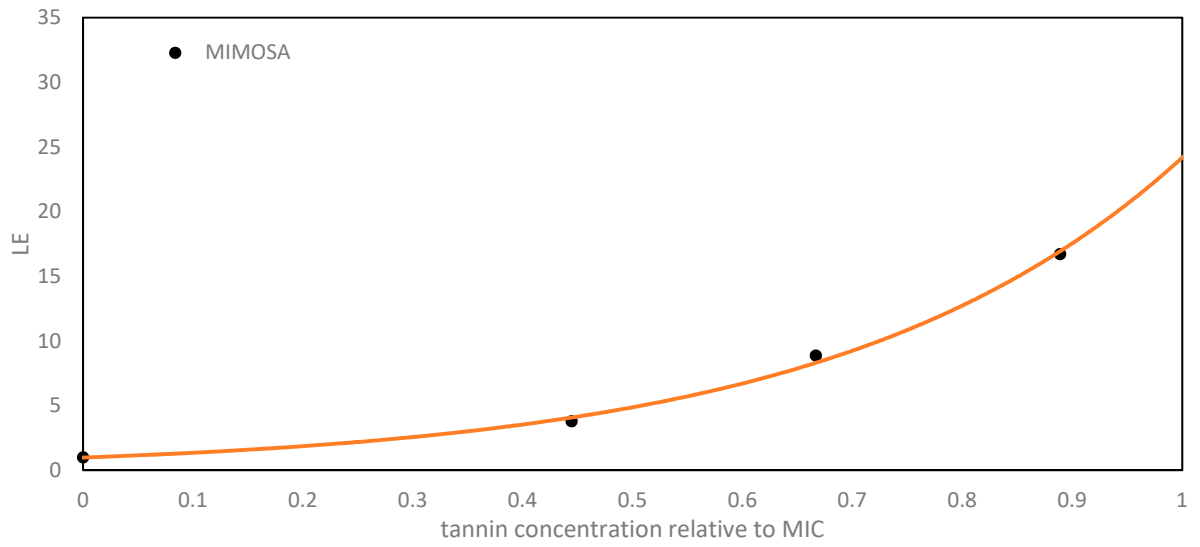

**Figure S5.** Dependence of lag time extension (LE) on the normalized concentration of the mimosa extract ( $c_M$ ).

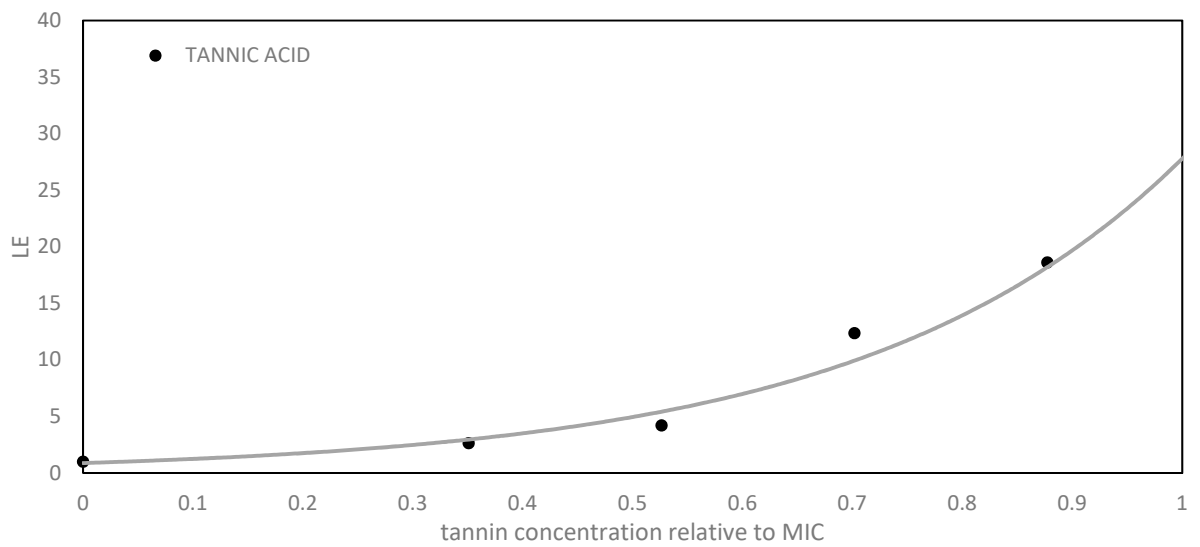

**Figure S6.** Dependence of lag time extension (LE) on the normalized concentration of tannic acid ( $c_M$ ).

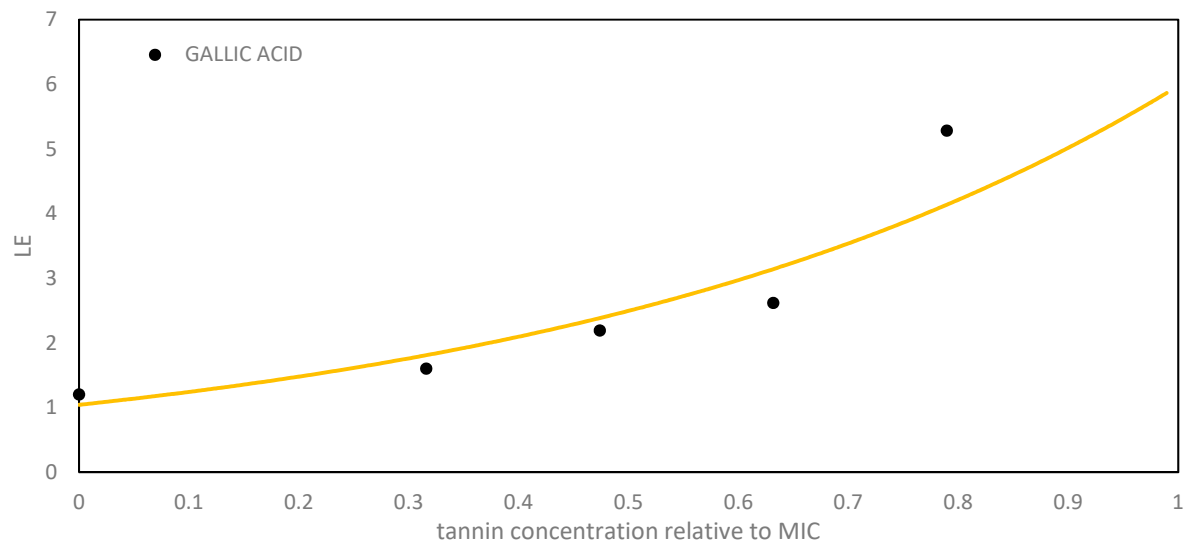

**Figure S7.** Dependence of lag time extension (LE) on the normalized concentration of gallic acid ( $c_M$ ).

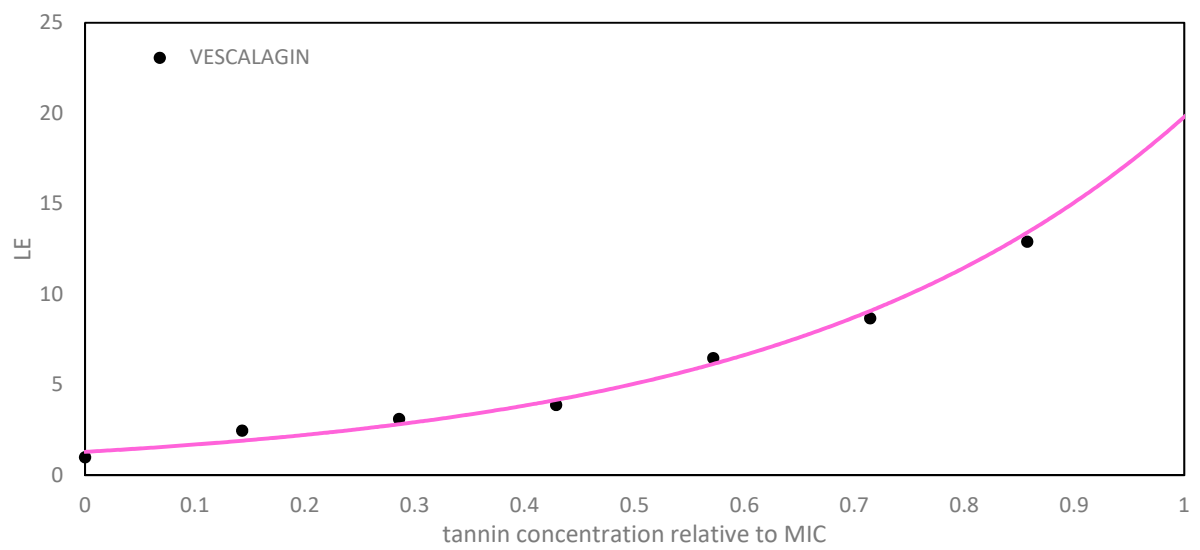

**Figure S8.** Dependence of lag time extension (LE) on the normalized concentration of vescalagin ( $c_M$ ).

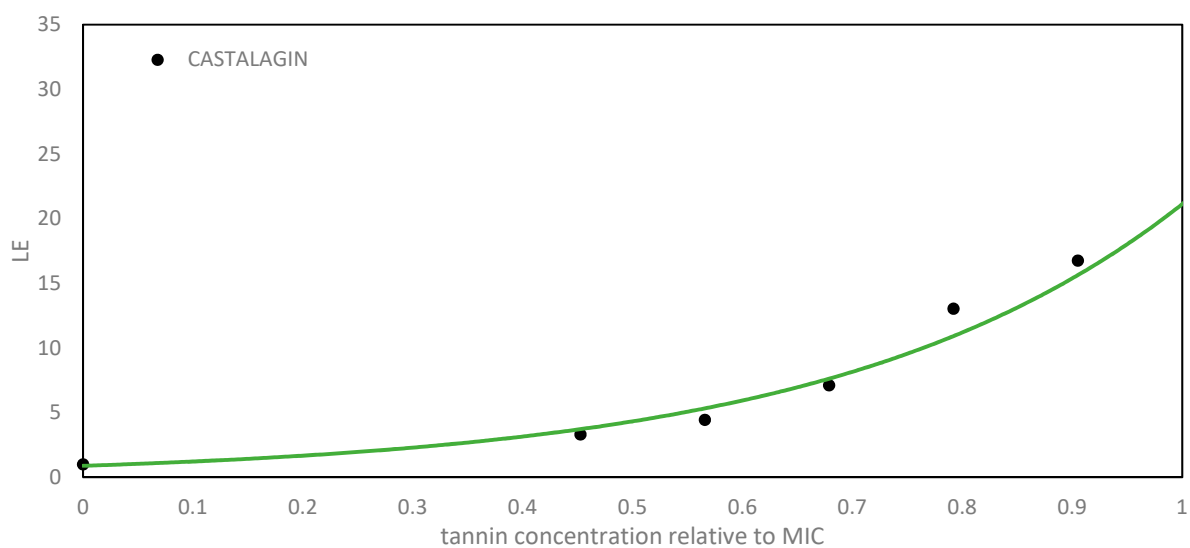

**Figure S9.** Dependence of lag time extension (LE) on the normalized concentration of castalagin ( $c_M$ ).

**Table S1.** Exponential functions of LE against  $c_M$  and the corresponding correlation coefficients ( $R^2$ ).

| Sample      | LE                     | $R^2$ |
|-------------|------------------------|-------|
| Chestnut    | $1.0071e^{2.1761c_M}$  | 0.968 |
| Quebracho   | $0.09291e^{3.1728c_M}$ | 0.974 |
| Colistizer  | $1.0094e^{3.2683c_M}$  | 0.995 |
| Mimosa      | $0.9806e^{3.2052c_M}$  | 0.998 |
| Tannic acid | $0.8818e^{3.4504c_M}$  | 0.975 |
| Gallic acid | $1.0431e^{1.7455c_M}$  | 0.893 |
| Vescalagin  | $1.2926e^{2.7292c_M}$  | 0.965 |
| Castalagin  | $0.8844e^{3.1734c_M}$  | 0.980 |
